# Supplementary material for: Dual imaging agent for magnetic particle imaging and computed tomography
Source: Royal Society of Chemistry journal article supplement (doi:10.1039/d3na00105a), 2023-01-01
Supplement: d3na00105a1.pdf [file d3na00105a1.pdf]

Supporting Information

**Dual imaging agent for magnetic particle imaging and computed tomography**

Sitong Liu<sup>1</sup>, Anahita Heshmat<sup>2</sup>, Jennifer Andrew<sup>3</sup>, Izabella Barreto<sup>2</sup>, and Carlos M Rinaldi-Ramos<sup>1,4, +</sup>

Affiliations:

1. Department of Chemical Engineering, University of Florida, Gainesville, FL 32611, USA
2. Department of Radiology, University of Florida, Gainesville, FL 32610-0374, USA
3. Department of Material Science and Engineering, University of Florida, Gainesville, FL 32603, USA
4. J. Crayton Pruitt Family Department of Biomedical Engineering, University of Florida, Gainesville, FL 32611-6131, USA

+Corresponding author

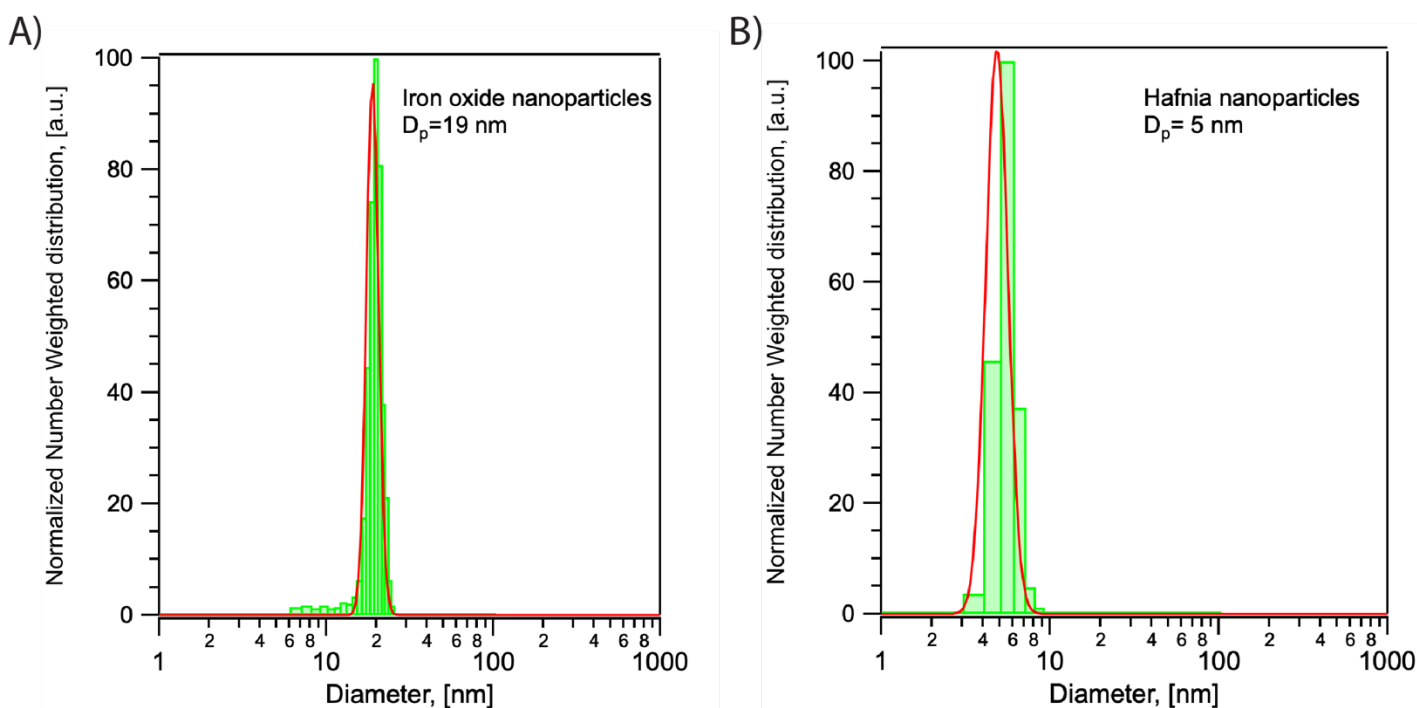

**Figure S1.** Physical size and size distribution for the nanoparticles. A) SPIONs. B) hafnia nanoparticles.

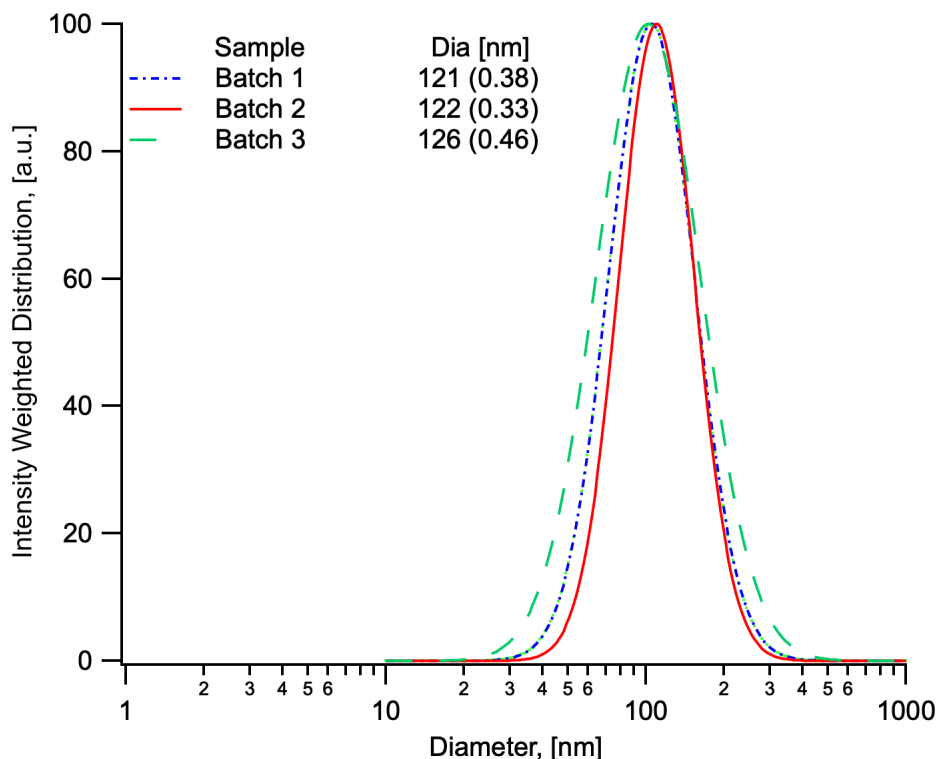

**Figure S2.** Hydrodynamic diameter and its distribution of three batches of the dual imaging agents obtained from DLS suggest formulation reproducibility.

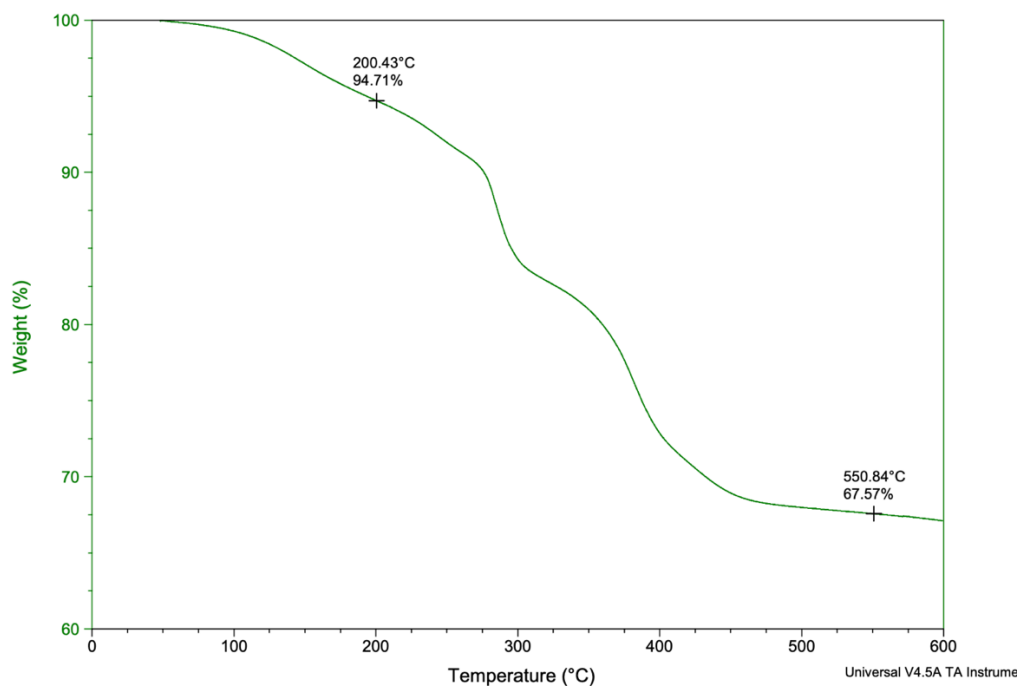

**Figure S3.** TGA scan for the dual imaging agents. The mass loss below 200 °C is considered moisture and solvent and not considered while performing calculations. The organic mass percentage was 28.6% determined by the weight loss percentage between 200 °C and 550 °C. The inorganic mass was 71.4% containing iron oxide and hafnium oxide.

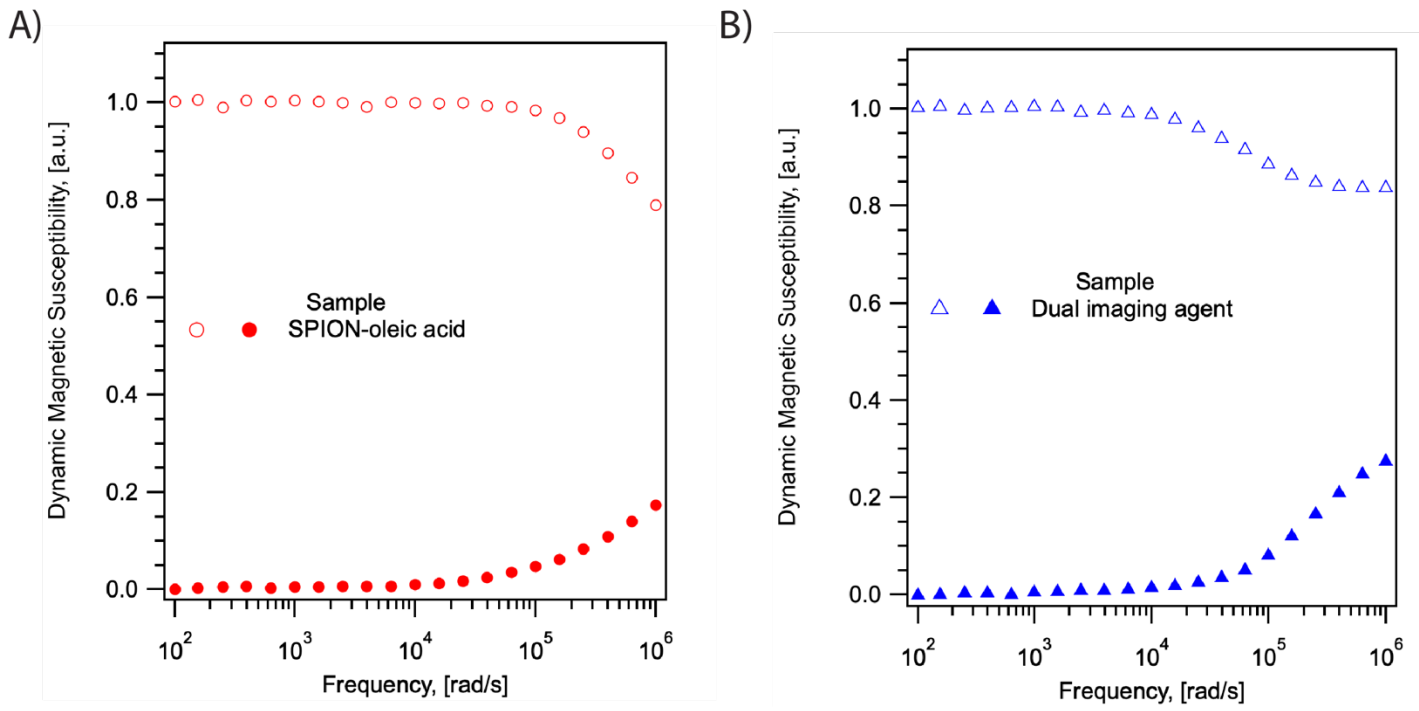

**Figure S4.** Dynamic magnetic susceptibility characterization. A) SPIONs with oleic acid coating. B) the dual imaging agents.

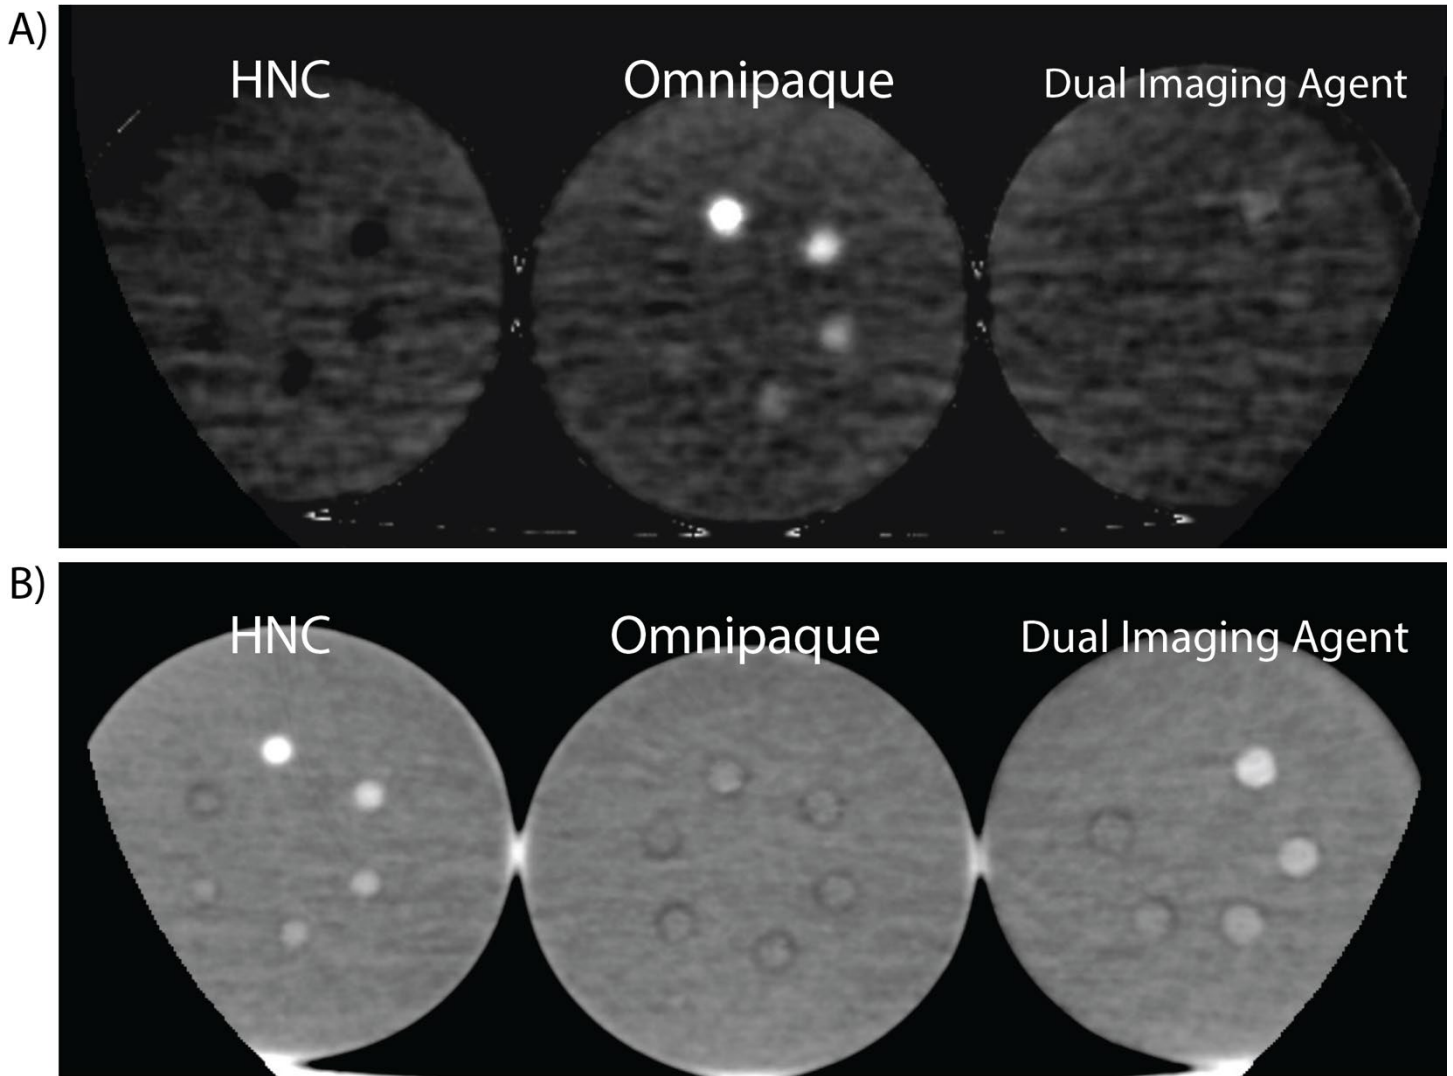

**Figure S5.** A) Iodine map for the contrast agents obtained from clinical CT dual-energy protocol. B) Virtual non-contrast image for the contrast agents obtained from clinical CT dual-energy protocol.

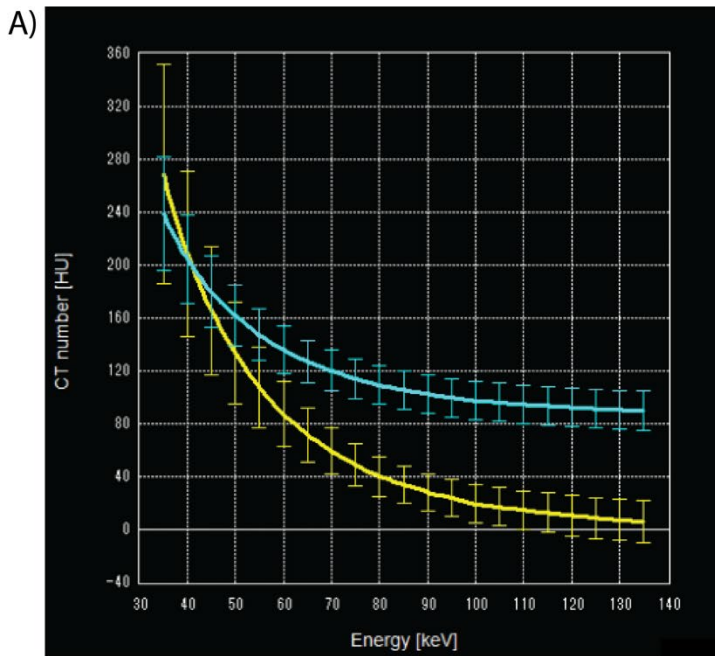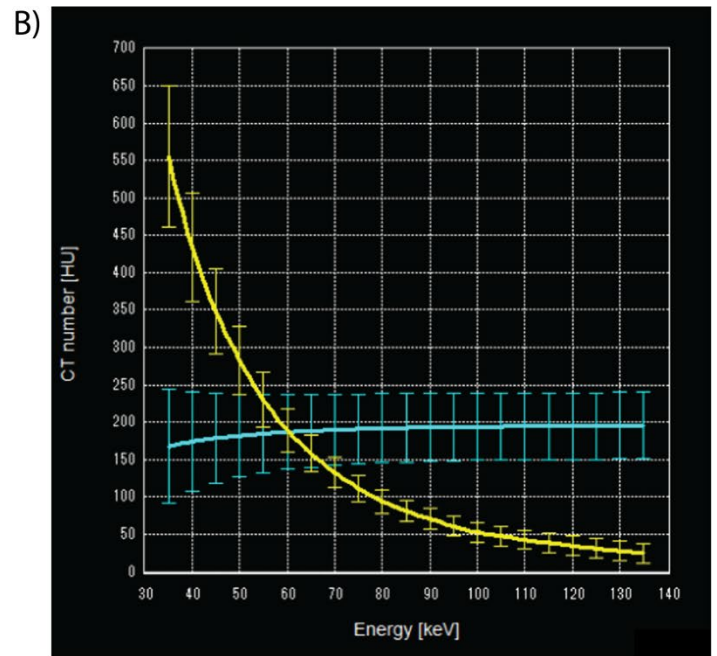

**Figure S6.** Curves of CT numbers for various virtual monoenergetic images for the contrast agents obtained from clinical CT dual-energy protocol. Yellow curves represent Omnipaque in both figures. The blue curves represent the dual imaging agents (A) and the HNCs (B).
